# Supplementary material for: Imprinted Genes and the Environment: Links to the Toxic Metals Arsenic, Cadmium and Lead
Source: MDPI journal article supplement (doi:10.3390/genes5020477), 2014-06-11
Supplement: s1 [file s1]

## Supplementary Information

**Table S1.** Confirmed and predicted Imprinted Genes.

| Gene ID         | Full Gene Name                                              | Location        | Status    | Expressed Allele  |
|-----------------|-------------------------------------------------------------|-----------------|-----------|-------------------|
| <i>ABCC9</i>    | ATP-binding cassette, sub-family C, member 9                | 12p12.1 AS      | Predicted | Maternal          |
| <i>ABCG8</i>    | ATP-binding cassette, sub-family G, member 8                | 2p21            | Predicted | Maternal          |
| <i>ACD</i>      | Adrenocortical dysplasia homolog                            | 16q22.1 AS      | Predicted | Maternal          |
| <i>ADAMTS16</i> | ADAM metalloproteinase with thrombospondin type 1 motif, 16 | 5p15            | Predicted | Maternal          |
| <i>AIM1</i>     | Absent in melanoma 1                                        | 6q21            | Imprinted | Paternal          |
| <i>ALDH1L1</i>  | Aldehyde dehydrogenase 1 family, member L1                  | 3q21.3 AS       | Predicted | Maternal          |
| <i>ANO1</i>     | Anoctamin 1, calcium activated chloride channel             | 11q13.3         | Imprinted | Maternal          |
| <i>APBA1</i>    | Amyloid beta precursor protein-binding, family A, member 1  | 9q13-q21.1 AS   | Predicted | Paternal          |
| <i>ATP10A</i>   | ATPase, class V, type 10A                                   | 15q11.2 AS      | Imprinted | Maternal          |
| <i>B4GALNT4</i> | Beta-1,4-N-acetyl-galactosaminyl transferase 4              | 11p15.5         | Predicted | Maternal          |
| <i>BLCAP</i>    | Bladder cancer associated protein                           | 20q11.2-q12 AS  | Imprinted | Isoform Dependent |
| <i>BMP8B</i>    | Bone morphogenetic protein 8b                               | 1p35-p32 AS     | Predicted | Paternal          |
| <i>BRP44L</i>   | Brain protein 44-like                                       | 6q27 AS         | Predicted | Paternal          |
| <i>BRUNOLA</i>  | Bruno-like 4, RNA binding protein                           | 18q12 AS        | Predicted | Maternal          |
| <i>BTNL2</i>    | Butyrophilin-like 2                                         | 6p21.3 AS       | Predicted | Maternal          |
| <i>C10orf91</i> | Chromosome 10 open reading frame 91                         | 10q26.3         | Predicted | Maternal          |
| <i>C10orf93</i> | Chromosome 10 open reading frame 93                         | 10q26.3 AS      | Predicted | Maternal          |
| <i>C16orf57</i> | Chromosome 16 open reading frame 57                         | 16q21           | Predicted | Maternal          |
| <i>C20orf20</i> | Chromosome 20 open reading frame 20                         | 20q13.33        | Predicted | Maternal          |
| <i>C20orf82</i> | Chromosome 20 open reading frame 82                         | 20p12.1         | Predicted | Paternal          |
| <i>C6orf117</i> | Chromosome 6 open reading frame 117                         | 6q14.3          | Predicted | Paternal          |
| <i>C9orf116</i> | Chromosome 9 open reading frame 116                         | 9q34.3 AS       | Predicted | Paternal          |
| <i>C9orf85</i>  | Chromosome 9 open reading frame 85                          | 9q21.13         | Predicted | Paternal          |
| <i>CCDC85A</i>  | Coiled-coil domain containing 85A                           | 2p16.1          | Predicted | Paternal          |
| <i>CDH18</i>    | Cadherin 18, type 2                                         | 5p15.2-p15.1 AS | Predicted | Paternal          |
| <i>CDK4</i>     | Cyclin-dependent kinase 4                                   | 12q14 AS        | Predicted | Maternal          |
| <i>CDKN1C</i>   | Cyclin-dependent kinase inhibitor 1C                        | 11p15.5 AS      | Imprinted | Maternal          |
| <i>CHMP2A</i>   | Chromatin modifying protein 2A                              | 19q AS          | Predicted | Maternal          |
| <i>CHST8</i>    | Carbohydrate sulfotransferase 8                             | 19q13.1         | Predicted | Maternal          |
| <i>COL9A3</i>   | Collagen, type IX, alpha 3                                  | 20q13.3         | Predicted | Maternal          |
| <i>COPG2IT1</i> | COPG2 imprinted transcript 1                                | 7q32            | Imprinted | Paternal          |
| <i>CPA4</i>     | Carboxypeptidase A4                                         | 7q32            | Imprinted | Maternal          |
| <i>CSF2</i>     | Colony stimulating factor 2                                 | 5q31.1          | Predicted | Maternal          |
| <i>CYP1B1</i>   | Cytochrome P450, family 1, subfamily B, polypeptide 1       | 2p21 AS         | Predicted | Paternal          |
| <i>DDC</i>      | Dopa decarboxylase                                          | 7p12.2 AS       | Imprinted | Isoform Dependent |
| <i>DGCR6</i>    | DiGeorge syndrome critical region gene 6                    | 22q11.21        | Imprinted | Unknown           |
| <i>DGCR6L</i>   | DiGeorge syndrome critical region gene 6-like               | 22q11 AS        | Imprinted | Unknown           |
| <i>DIRAS3</i>   | DIRAS family, GTP-binding RAS-like 3                        | 1p31 AS         | Imprinted | Paternal          |
| <i>DLGAP2</i>   | Discs, large homolog-associated protein 2                   | 8p23            | Imprinted | Paternal          |

Table S1. Cont.

| Gene ID          | Full Gene Name                                        | Location      | Status    | Expressed Allele  |
|------------------|-------------------------------------------------------|---------------|-----------|-------------------|
| <i>DLK1</i>      | Delta-like 1 homolog                                  | 14q32         | Imprinted | Paternal          |
| <i>DLX5</i>      | Distal-less homeobox 5                                | 7q22 AS       | Imprinted | Maternal          |
| <i>DNMT1</i>     | DNA (cytosine-5-)-methyltransferase 1                 | 19p13.2 AS    | Imprinted | Paternal          |
| <i>DVL1</i>      | Dishevelled, dsh homolog 1                            | 1p36 AS       | Predicted | Maternal          |
| <i>E2F7</i>      | E2F transcription factor 7                            | 12q21.2 AS    | Predicted | Maternal          |
| <i>EGFL7</i>     | EGF-like-domain, multiple 7                           | 9q34.3        | Predicted | Paternal          |
| <i>EVX1</i>      | Even-skipped homeobox 1                               | 7p15-p14      | Predicted | Paternal          |
| <i>FAM50B</i>    | Family with sequence similarity 50, member B          | 6p25.2        | Imprinted | Paternal          |
| <i>FAM59A</i>    | Family with sequence similarity 59, member A          | 18q12.1 AS    | Predicted | Paternal          |
| <i>FAM70B</i>    | Family with sequence similarity 70, member B          | 13q34         | Predicted | Maternal          |
| <i>FASTK</i>     | Fas-activated serine/threonine kinase                 | 7q35 AS       | Predicted | Maternal          |
| <i>FBRSL1</i>    | Fibrosin-like 1                                       | 12q24.33      | Predicted | Maternal          |
| <i>FERMT2</i>    | Fermitin family homolog 2                             | 14q22.1 AS    | Predicted | Paternal          |
| <i>FGFRL1</i>    | Fibroblast growth factor receptor-like 1              | 4p16          | Predicted | Maternal          |
| <i>FLJ20464</i>  | Hypothetical protein FLJ20464                         | 22q12.2       | Predicted | Paternal          |
| <i>FLJ40296</i>  | FLJ40296 protein                                      | 13q21.1       | Predicted | Maternal          |
| <i>FLJ46321</i>  | FAM75-like protein FLJ46321                           | 9q21.32       | Predicted | Maternal          |
| <i>FOXF1</i>     | Forkhead box F1                                       | 16q24         | Predicted | Maternal          |
| <i>FOXG1</i>     | Forkhead box G1                                       | 14q13         | Predicted | Paternal          |
| <i>FUCA1</i>     | Fucosidase, alpha-L-1, tissue                         | 1p34 AS       | Predicted | Paternal          |
| <i>GATA3</i>     | GATA binding protein 3                                | 10p15         | Predicted | Paternal          |
| <i>GFI1</i>      | Growth factor independent 1 transcription repressor   | 1p22 AS       | Predicted | Paternal          |
| <i>GLI3</i>      | GLI family zinc finger 3                              | 7p13 AS       | Predicted | Maternal          |
| <i>GLIS3</i>     | GLIS family zinc finger 3                             | 9p24.2 AS     | Imprinted | Paternal          |
| <i>GNAS</i>      | GNAS complex locus                                    | 20q13.3       | Imprinted | Isoform Dependent |
| <i>GNASAS</i>    | GNAS antisense RNA                                    | 20q13.32 AS   | Imprinted | Paternal          |
| <i>GPR1</i>      | G protein-coupled receptor 1                          | 2q33.3 AS     | Imprinted | Paternal          |
| <i>GPT</i>       | Glutamic-pyruvate transaminase                        | 8q24.3        | Predicted | Maternal          |
| <i>GRB10</i>     | Growth factor receptor-bound protein 10               | 7p12-p11.2 AS | Imprinted | Isoform Dependent |
| <i>H19</i>       | H19, imprinted maternally expressed untranslated mRNA | 11p15.5 AS    | Imprinted | Maternal          |
| <i>HES1</i>      | Hairy and enhancer of split 1,                        | 3q28-q29      | Predicted | Paternal          |
| <i>HIST3H2BB</i> | Histone cluster 3, H2bb                               | 1q42.13       | Predicted | Maternal          |
| <i>HOXA11</i>    | Homeobox A11                                          | 7p15-p14 AS   | Predicted | Maternal          |
| <i>HOXA2</i>     | Homeobox A2                                           | 7p15-p14 AS   | Predicted | Maternal          |
| <i>HOXA3</i>     | Homeobox A3                                           | 7p15-p14 AS   | Predicted | Maternal          |
| <i>HOXA4</i>     | Homeobox A4                                           | 7p15-p14 AS   | Predicted | Maternal          |
| <i>HOXA5</i>     | Homeobox A5                                           | 7p15-p14 AS   | Predicted | Maternal          |
| <i>HOXB2</i>     | Homeobox B2                                           | 17q21-q22 AS  | Predicted | Maternal          |
| <i>HOXB3</i>     | Homeobox B3                                           | 17q21.3 AS    | Predicted | Maternal          |
| <i>HOXC4</i>     | Homeobox C4                                           | 12q13.3       | Predicted | Maternal          |
| <i>HOXC9</i>     | Homeobox C9                                           | 12q13.3       | Predicted | Maternal          |

Table S1. Cont.

| Gene ID             | Full Gene Name                                                       | Location     | Status    | Expressed Allele |
|---------------------|----------------------------------------------------------------------|--------------|-----------|------------------|
| <i>HSPA6</i>        | Heat shock 70 kDa protein 6                                          | 1q23         | Predicted | Maternal         |
| <i>HYMAI</i>        | Hydatidiform mole associated and imprinted                           | 6q24.2 AS    | Imprinted | Paternal         |
| <i>IFITM1</i>       | Interferon induced transmembrane protein 1                           | 11p15.5      | Predicted | Maternal         |
| <i>IGF2</i>         | Insulin-like growth factor 2                                         | 11p15.5 AS   | Imprinted | Paternal         |
| <i>IGF2AS</i>       | Insulin-like growth factor 2 antisense                               | 11p15.5      | Imprinted | Paternal         |
| <i>INPP5F</i>       | inositol polyphosphate-5-phosphatase F                               | 10q26.11     | Imprinted | Paternal         |
| <i>INS</i>          | Insulin                                                              | 11p15.5 AS   | Imprinted | Paternal         |
| <i>ISM1</i>         | Isthmin 1 homolog                                                    | 20p12.1      | Predicted | Paternal         |
| <i>KBTD3</i>        | Kelch repeat and BTB domain containing 3                             | 11q22.3 AS   | Predicted | Paternal         |
| <i>KCNK9</i>        | Potassium channel, subfamily K, member 9                             | 8q24.3 AS    | Imprinted | Maternal         |
| <i>KCNQ1</i>        | Potassium voltage-gated channel, KQT-like subfamily, member 1        | 11p15.5      | Imprinted | Maternal         |
| <i>KCNQ1DN</i>      | KCNQ1 downstream neighbor                                            | 11p15.4      | Imprinted | Maternal         |
| <i>KCNQ1OT1</i>     | KCNQ1 overlapping transcript 1                                       | 11p15        | Imprinted | Paternal         |
| <i>KIAA1530</i>     | UV-Stimulated Scaffold Protein A                                     | 4p16.3       | Predicted | Maternal         |
| <i>KIAA1545</i>     | KIAA1545 protein                                                     | 12q24.33     | Predicted | Maternal         |
| <i>KLF14</i>        | Kruppel-like factor 14                                               | 7q32.3 AS    | Imprinted | Maternal         |
| <i>L3MBTL</i>       | L(3)mbt-like                                                         | 20q13.12     | Imprinted | Paternal         |
| <i>LDB1</i>         | LIM domain binding 1                                                 | 10q24-q25 AS | Predicted | Maternal         |
| <i>LILRB4</i>       | Leukocyte immunoglobulin-like receptor, subfamily B, member 4        | 19q13.4      | Predicted | Maternal         |
| <i>LIN28B</i>       | Lin-28 homolog B                                                     | 6q21         | Imprinted | Paternal         |
| <i>LMX1B</i>        | LIM homeobox transcription factor 1, beta                            | 9q34         | Predicted | Maternal         |
| <i>LOC100131170</i> | Hypothetical LOC100131170                                            | 17q25.3 AS   | Predicted | Paternal         |
| <i>LRRTM1</i>       | Leucine rich repeat transmembrane neuronal 1                         | 2p12 AS      | Imprinted | Paternal         |
| <i>LY6D</i>         | Lymphocyte antigen 6 complex, locus D                                | 8q24-qter AS | Predicted | Paternal         |
| <i>MAGEL2</i>       | MAGE-like 2                                                          | 15q11-q12 AS | Imprinted | Paternal         |
| <i>MAGI2</i>        | Membrane associated guanylate kinase, WW and PDZ domain containing 2 | 7q21 AS      | Imprinted | Maternal         |
| <i>MCTS2</i>        | 20q11.21                                                             | 20q11.21     | Imprinted | Paternal         |
| <i>MEG3</i>         | Maternally expressed 3                                               | 14q32        | Imprinted | Maternal         |
| <i>MEST</i>         | Mesoderm specific transcript homolog                                 | 7q32         | Imprinted | Paternal         |
| <i>MESTIT1</i>      | MEST intronic transcript 1, antisense RNA                            | 7q32.2 AS    | Imprinted | Paternal         |
| <i>MIMT1</i>        | MER1 repeat containing imprinted transcript 1                        | 19q13.4      | Imprinted | Paternal         |
| <i>MIR296</i>       | MicroRNA 296                                                         | 20q13.32 AS  | Imprinted | Paternal         |
| <i>MIR298</i>       | MicroRNA 298                                                         | 20q13.32 AS  | Imprinted | Paternal         |
| <i>MIR371A</i>      | MicroRNA 371a                                                        | 19q13.42     | Imprinted | Paternal         |
| <i>MKRN3</i>        | Makorin ring finger protein 3                                        | 15q11-q13    | Imprinted | Paternal         |
| <i>MRAP2</i>        | Melanocortin 2 receptor accessory protein 2                          | 6q14.2       | Predicted | Paternal         |
| <i>MYEOV2</i>       | Myeloma overexpressed 2                                              | 2q37.3 AS    | Predicted | Paternal         |
| <i>MZF1</i>         | Myeloid zinc finger 1                                                | 19q13.4 AS   | Predicted | Maternal         |
| <i>NAA60</i>        | N(alpha)-acetyltransferase 60, NatF catalytic subunit                | 16p13.3      | Imprinted | Maternal         |
| <i>NAP1L5</i>       | Nucleosome assembly protein 1-like 5                                 | 4q22.1 AS    | Imprinted | Paternal         |

Table S1. Cont.

| Gene ID         | Full Gene Name                                                    | Location        | Status    | Expressed Allele |
|-----------------|-------------------------------------------------------------------|-----------------|-----------|------------------|
| <i>NDN</i>      | Necdin homolog                                                    | 15q11.2-q12 AS  | Imprinted | Paternal         |
| <i>NDUFA4P1</i> | NADH dehydrogenase 1 alpha subcomplex, 4, 9 kDa, pseudogene 1     | 1p13.3          | Predicted | Paternal         |
| <i>NKAIN3</i>   | Na <sup>+</sup> /K <sup>+</sup> transporting ATPase interacting 3 | 8q12.3          | Predicted | Paternal         |
| <i>NKX6-2</i>   | NK6 homeobox 2                                                    | 10q26 AS        | Predicted | Maternal         |
| <i>NLRP2</i>    | NLR family, pyrin domain containing 2                             | 19q13.42        | Imprinted | Maternal         |
| <i>NNAT</i>     | Neuronatin                                                        | 20q11.2-q12     | Imprinted | Paternal         |
| <i>NPAP1</i>    | Nuclear pore associated protein 1                                 | 15q11-q13       | Imprinted | Unknown          |
| <i>NTM</i>      | Neurotrimin                                                       | 11q25           | Imprinted | Maternal         |
| <i>OBSCN</i>    | Obscurin, cytoskeletal calmodulin and titin-interacting RhoGEF    | 1q42.13         | Predicted | Paternal         |
| <i>OR11L1</i>   | Olfactory receptor, family 11, subfamily L, member 1              | 1q44 AS         | Predicted | Paternal         |
| <i>OSBPL5</i>   | Oxysterol binding protein-like 5                                  | 11p15.4 AS      | Imprinted | Maternal         |
| <i>OTX1</i>     | Orthodenticle homeobox 1                                          | 2p13            | Predicted | Maternal         |
| <i>PAOX</i>     | Polyamine oxidase                                                 | 10q26.3         | Predicted | Maternal         |
| <i>PEG10</i>    | Paternally expressed 10                                           | 7q21            | Imprinted | Paternal         |
| <i>PEG3</i>     | Paternally expressed gene 3                                       | 19q13.4 AS      | Imprinted | Paternal         |
| <i>PEX10</i>    | Peroxisomal biogenesis factor 10                                  | 1p36.32 AS      | Predicted | Maternal         |
| <i>PHLDA2</i>   | Pleckstrin homology-like domain, family A, member 2               | 11p15.5 AS      | Imprinted | Maternal         |
| <i>PHPT1</i>    | Phosphohistidine phosphatase 1                                    | 9q34.3          | Predicted | Maternal         |
| <i>PKP3</i>     | Plakophilin 3                                                     | 11p15           | Predicted | Maternal         |
| <i>PLAGL1</i>   | Pleiomorphic adenoma gene-like 1                                  | 6q24-q25 AS     | Imprinted | Paternal         |
| <i>PPAP2C</i>   | Phosphatidic acid phosphatase type 2C                             | 19p13 AS        | Predicted | Maternal         |
| <i>PPP1R9A</i>  | Protein phosphatase 1, regulatory subunit 9A                      | 7q21.3          | Imprinted | Maternal         |
| <i>PRDM16</i>   | PR domain containing 16                                           | 1p36.23-p33     | Predicted | Paternal         |
| <i>PSIMCT-1</i> | Malignant T cell amplified sequence 1 pseudogene                  | 20q11.2         | Imprinted | Paternal         |
| <i>PTPN14</i>   | Protein tyrosine phosphatase, non-receptor type 14                | 1q32.2 AS       | Predicted | Maternal         |
| <i>PURG</i>     | Purine-rich element binding protein G                             | 8p11 AS         | Predicted | Paternal         |
| <i>PWCR1</i>    | Prader-Willi syndrome chromosome region 1                         | 15q11.2         | Imprinted | Paternal         |
| <i>PYY2</i>     | Peptide YY, 2                                                     | 17q11           | Predicted | Paternal         |
| <i>RAB1B</i>    | RAB1B, member RAS oncogene family                                 | 11q12           | Predicted | Maternal         |
| <i>RB1</i>      | Retinoblastoma 1                                                  | 13q14.2         | Imprinted | Maternal         |
| <i>RBP5</i>     | Retinol binding protein 5, cellular                               | 12p13.31 AS     | Imprinted | Maternal         |
| <i>RNU5D-1</i>  | RNA, U5D small nuclear 1                                          | 1p34.1 AS       | Imprinted | Paternal         |
| <i>RPL22</i>    | Ribosomal protein L22                                             | 1p36.3-p36.2 AS | Predicted | Paternal         |
| <i>SALL1</i>    | Sal-like 1                                                        | 16q12.1 AS      | Predicted | Maternal         |
| <i>SANG</i>     | GNAS1 antisense                                                   | 20q13.32        | Imprinted | Paternal         |
| <i>SGCE</i>     | Sarcoglycan, epsilon                                              | 7q21-q22 AS     | Imprinted | Paternal         |
| <i>SIM2</i>     | Single-minded homolog 2                                           | 21q22.2         | Predicted | Paternal         |
| <i>SLC22A18</i> | Solute carrier family 22, member 18                               | 11p15.5         | Imprinted | Maternal         |
| <i>SLC22A2*</i> | Solute carrier family 22, member 2                                | 6q26 AS         | Imprinted | Maternal         |
| <i>SLC22A3*</i> | Solute carrier family 22, member 3                                | 6q26-q27        | Imprinted | Maternal         |
| <i>SLC26A10</i> | Solute carrier family 26, member 10                               | 12q13           | Predicted | Maternal         |

Table S1. Cont.

| Gene ID            | Full Gene Name                                            | Location      | Status    | Expressed Allele |
|--------------------|-----------------------------------------------------------|---------------|-----------|------------------|
| <i>SLC4A2</i>      | Solute carrier family 4, anion exchanger, member 2        | 7q35-q36      | Predicted | Maternal         |
| <i>SNORD107</i>    | Small nucleolar RNA, C/D box 107                          | 15q11.2       | Imprinted | Paternal         |
| <i>SNORD108</i>    | Small nucleolar RNA, C/D box 108                          | 15q11.2       | Imprinted | Paternal         |
| <i>SNORD109A</i>   | Small nucleolar RNA, C/D box 109A                         | 15q11.2       | Imprinted | Paternal         |
| <i>SNORD109B</i>   | Small nucleolar RNA, C/D box 109B                         | 15q11.2       | Imprinted | Paternal         |
| <i>SNORD115@</i>   | Small nucleolar RNA, C/D box 115 cluster                  | 15q11.2       | Imprinted | Paternal         |
| <i>SNORD115-48</i> | Small nucleolar RNA, C/D box 115-48                       | 15q11.2       | Imprinted | Paternal         |
| <i>SNORD116@</i>   | Small nucleolar RNA, C/D box 116 cluster                  | 15q11.2       | Imprinted | Paternal         |
| <i>SNORD64</i>     | Small nucleolar RNA, C/D box 64                           | 15q12         | Imprinted | Paternal         |
| <i>SNRPN</i>       | Small nuclear ribonucleoprotein polypeptide N             | 15q11.2       | Imprinted | Paternal         |
| <i>SNURF</i>       | SNRPN upstream reading frame                              | 15q12         | Imprinted | Paternal         |
| <i>SOX8</i>        | SRY-box 8                                                 | 16p13.3       | Predicted | Paternal         |
| <i>SPON2</i>       | Spondin 2, extracellular matrix protein                   | 4p16.3 AS     | Predicted | Paternal         |
| <i>TCEB3C</i>      | Transcription elongation factor B polypeptide 3C          | 18q21.1 AS    | Imprinted | Maternal         |
| <i>TFPI2</i>       | Tissue factor pathway inhibitor 2                         | 7q22 AS       | Imprinted | Maternal         |
| <i>TIGD1</i>       | Tigger transposable element derived 1                     | 2q37.1 AS     | Predicted | Paternal         |
| <i>TMEM52</i>      | Transmembrane protein 52                                  | 1p36.33 AS    | Predicted | Paternal         |
| <i>TMEM60</i>      | Transmembrane protein 60                                  | 7q11.23 AS    | Predicted | Paternal         |
| <i>TMEM88</i>      | Transmembrane protein 88                                  | 17p13.1       | Predicted | Maternal         |
| <i>TP73</i>        | Tumor protein p73                                         | 1p36.3        | Imprinted | Maternal         |
| <i>TSHZ3</i>       | Teashirt zinc finger homeobox 3                           | 19q12 AS      | Predicted | Paternal         |
| <i>UBE3A</i>       | Ubiquitin protein ligase E3A                              | 15q11-q13 AS  | Imprinted | Maternal         |
| <i>VAX2</i>        | Ventral anterior homeobox 2                               | 2p13          | Predicted | Maternal         |
| <i>VENTX</i>       | VENT homeobox homolog                                     | 10q26.3       | Predicted | Maternal         |
| <i>WDR8</i>        | WD repeat domain 8                                        | 1p36.3 AS     | Predicted | Maternal         |
| <i>WT1</i>         | Wilms tumor 1                                             | 11p13 AS      | Imprinted | Paternal         |
| <i>ZC3H12C</i>     | Zinc finger CCCH-type containing 12C                      | 11q22.3       | Imprinted | Paternal         |
| <i>ZDBF2</i>       | Zinc finger, DBF-type containing 2                        | 2q33.3        | Imprinted | Paternal         |
| <i>ZFAT</i>        | Zinc finger and AT hook domain containing                 | 8q24.22 AS    | Imprinted | Paternal         |
| <i>ZFAT-AS1</i>    | Zinc finger and AT hook domain containing antisense RNA 1 | 8q24.22       | Imprinted | Paternal         |
| <i>ZFP36L2</i>     | Zinc finger protein 36, C3H type-like 2                   | 2p22.3-p21 AS | Predicted | Maternal         |
| <i>ZIC1</i>        | Zic family member 1                                       | 3q24          | Predicted | Maternal         |
| <i>ZIM2</i>        | Zinc finger, imprinted 2                                  | 19q13.4 AS    | Imprinted | Paternal         |
| <i>ZNF225</i>      | Zinc finger protein 225                                   | 19q13.2       | Predicted | Paternal         |
| <i>ZNF229</i>      | Zinc finger protein 229                                   | 19q13.31 AS   | Predicted | Maternal         |
| <i>ZNF597</i>      | Zinc finger protein 597                                   | 16p13.3 AS    | Imprinted | Maternal         |

**Table S2.** Associations between the imprinted gene set and Arsenic, Cadmium, Lead, and Mercury in human studies curated through the Comparative Toxicogenomics Database.

| Gene ID         | Metal   | Interaction                                                       | Status    | PMID                                         |
|-----------------|---------|-------------------------------------------------------------------|-----------|----------------------------------------------|
| <i>ACD</i>      | Lead    | decreased expression of ACD mRNA                                  | Predicted | 19921347                                     |
| <i>ANO1</i>     | Arsenic | increased methylation of ANO1 promoter region                     | Imprinted | 21291286                                     |
| <i>APBA1</i>    | Cadmium | decreased expression of APBA1 mRNA                                | Predicted | 12634122                                     |
|                 | Lead    | decreased expression of APBA1 mRNA                                | Predicted | 12634122                                     |
| <i>C9ORF116</i> | Cadmium | increased expression of C9ORF116 mRNA                             | Predicted | 21457566                                     |
| <i>CDK4</i>     | Arsenic | increased expression of CDK4 mRNA                                 | Predicted | 20654705<br>17530484<br>19769630<br>20016248 |
|                 | Lead    | increased expression of CDK4 mRNA                                 | Predicted | 19921347                                     |
| <i>CDKN1C</i>   | Arsenic | increased expression of CDKN1C mRNA                               | Imprinted | 18585445                                     |
| <i>CSF2</i>     | Arsenic | decreased expression of RELA, CASP3, and CASP8 proteins           | Predicted | 16174796                                     |
|                 |         | increased expression of CSF2 protein                              | Predicted | 11312651                                     |
|                 | Cadmium | increased expression and secretion of CSF2 protein                | Predicted | 18082304                                     |
| <i>CYP1B1</i>   | Arsenic | increased expression of CYP1B1 mRNA                               | Predicted | 17530438<br>15894607                         |
|                 | Cadmium | decreased expression of CYP1B1 mRNA                               | Predicted | 12760830<br>18560533                         |
| <i>DLK1</i>     | Arsenic | DLK1 protein affects the susceptibility to Arsenic                | Imprinted | 18575777                                     |
| <i>DNMT1</i>    | Arsenic | decreased expression of DNMT1 mRNA                                | Imprinted | 23159075<br>20596618<br>21176356<br>16613325 |
|                 |         | decreased expression of DNMT1 protein                             | Imprinted | 22558281<br>21687957                         |
|                 | Cadmium | decreased expression of DNMT1 mRNA                                | Imprinted | 22112500                                     |
| <i>E2F7</i>     | Arsenic | decreased expression of E2F7 mRNA                                 | Predicted | 19945496                                     |
| <i>EGFL7</i>    | Lead    | decreased expression of EGFL7 mRNA                                | Predicted | 19921347                                     |
| <i>FOXF1</i>    | Arsenic | increased methylation of FOXF1 promoter                           | Predicted | 21291286                                     |
| <i>FUCA1</i>    | Arsenic | increased expression of FUCA1 mRNA                                | Predicted | 20458559                                     |
| <i>GATA3</i>    | Arsenic | inhibits the binding of GATA3 and IL13 promoter and KPNA2 protein | Predicted | 19080345                                     |
| <i>GNAS</i>     | Lead    | increased expression of GNAS mRNA                                 | Imprinted | 19921347                                     |
| <i>GPT</i>      | Cadmium | decreased expression of GPT protein                               | Predicted | 11281253                                     |
| <i>GRB10</i>    | Arsenic | increased expression of GRB10 mRNA                                | Imprinted | 20458559                                     |
|                 | Arsenic | GRB10 mRNA affects the susceptibility to arsenic                  | Predicted | 23911876                                     |
|                 | Cadmium | decreased expression of GRB10 mRNA                                | Predicted | 12160620                                     |
| <i>HES1</i>     | Arsenic | decreases expression of HES1 mRNA                                 | Predicted | 23832679<br>20458559<br>23497375<br>18633435 |
| <i>HOXA5</i>    | Arsenic | decreased expression of HOXA5 mRNA                                | Predicted | 21461292                                     |
| <i>HSPA6</i>    | Arsenic | increased expression of HSPA6 mRNA                                | Predicted | 19417148<br>16132727<br>15978632             |

Table S2. Cont.

| Gene ID         | Metal   | Interaction                                                                 | Status    | PMID                             |
|-----------------|---------|-----------------------------------------------------------------------------|-----------|----------------------------------|
|                 |         | increased expression of HSPA6 protein                                       | Predicted | 15978632<br>19364129             |
|                 | Cadmium | Increased expression of HSPA6 mRNA                                          | Predicted | 21172416<br>22562489<br>12064557 |
|                 | Mercury | Increased expression of HSPA6 mRNA                                          | Predicted | 22129749                         |
| <i>IFITM1</i>   | Arsenic | decreased expression of IFITM1 mRNA                                         | Predicted | 12890387                         |
| <i>IGF2</i>     | Cadmium | promotes binding of IGF2 protein to IGF1R protein                           | Validated | 9648927                          |
| <i>INS</i>      | Arsenic | decreased methylation of INS promoter                                       | Imprinted | 23315758                         |
|                 | Cadmium | decreased expression of INS protein                                         | Predicted | 17303580                         |
| <i>LILRB4</i>   | Lead    | Altered expression of LILRB4 in relation to cord blood level concentrations | Predicted | 22313790                         |
| <i>MRAP2</i>    | Mercury | MRAP2 protein increases susceptibility to mercury                           | Predicted | 21139347                         |
| <i>NDUFA4</i>   | Arsenic | increased expression of NDUFA4 mRNA                                         | Predicted | 20458559                         |
| <i>OSBPL5</i>   | Arsenic | altered expression of OSBPL5 mRNA                                           | Imprinted | 18414638                         |
| <i>PAOX</i>     | Arsenic | increased expression of PAOX mRNA                                           | Predicted | 15761015                         |
| <i>PHLDA2</i>   | Arsenic | decreased expression of PHLDA2 mRNA                                         | Imprinted | 15761015                         |
| <i>PKP3</i>     | Arsenic | PKP3 protein results in decreased susceptibility to arsenic                 | Predicted | 20707922                         |
| <i>PPAP2C</i>   | Arsenic | PPAP2C protein results in decreased susceptibility to arsenic               | Predicted | 20707922                         |
| <i>PURG</i>     | Arsenic | increased expression of PURG mRNA                                           | Predicted | 15761015                         |
| <i>RB1</i>      | Arsenic | decreased expression of RB1 proteins                                        | Imprinted | 20953137                         |
|                 |         | decreased phosphorylation of RB1 proteins                                   | Imprinted | 12480548                         |
|                 | Cadmium | promotes phosphorylation of RB1 protein, binding of E2F1 protein            | Imprinted | 20839231                         |
|                 |         | decreased expression of RB1 mRNA                                            | Imprinted | 20839231                         |
| <i>SLC22A18</i> | Arsenic | decreased expression of SLC22A18 mRNA                                       | Imprinted | 15725085                         |
| <i>SLC22A2</i>  | Mercury | decreased activity of SLC22A2 protein                                       | Predicted | 17287197                         |
| <i>SLC26A10</i> | Arsenic | decreased expression of SLC26A10 mRNA                                       | Predicted | 22521957                         |
| <i>SLC4A2</i>   | Arsenic | increased expression of SLC4A2 protein                                      | Predicted | 17018029                         |
| <i>SPON2</i>    | Arsenic | decreased expression of SPON2 mRNA                                          | Predicted | 19128835                         |
|                 | Cadmium | decreased expression of SPON2 mRNA                                          | Predicted | 21457566                         |
| <i>TIGD1</i>    | Arsenic | affects the expression of TIGD1 mRNA                                        | Predicted | 18414638                         |
| <i>TP73</i>     | Arsenic | increased expression of TP73 protein alternative form                       | Imprinted | 16467208<br>15031205             |
|                 |         | increased TP73 protein binding to TP53AIP1 promoter                         | Predicted | 15031205                         |
|                 |         | increased acetylation of TP73 protein                                       | Predicted | 15031205                         |
|                 |         | increased expression of TP73 mRNA                                           | Predicted | 19763917<br>20458559             |
| <i>UBE3A</i>    | Arsenic | increased expression of UBE3A mRNA                                          | Imprinted | 20458559                         |
| <i>WT1</i>      | Arsenic | decreased expression of WT1 mRNA                                            | Predicted | 16966277<br>20471514             |
|                 |         | decreased expression of WT1 protein                                         | Predicted | 16966277                         |
